# Supplementary material
Source: HighWire-hosted journal article supplement (https://qdcxjkg.com/highwire/filestream/112851/field_highwire_adjunct_files/3/Table_E2_nov2_2005.pdf)
Supplement: Table_E2_nov2_2005.pdf [file Table_E2_nov2_2005.pdf]

**Table E2. Number (proportion) of patients who had permanent adjustments of maintenance treatment during Phase 2**

|                     | Clinical Strategy | Sputum Strategy |
|---------------------|-------------------|-----------------|
| Same dose ICS       | 40 (76.9)         | 36 (72.0)       |
| ICS dose* increased |                   |                 |
| 125                 | 1 (1.9)           | 2 (4.0)         |
| 250                 | 3 (5.8)           | 4 (8.0)         |
| 500                 | 5 (9.6)           | -               |
| 750                 | -                 | 1 (2.0)         |
| 1000                | 1 (1.9)           | -               |
| ICS dose decreased  |                   |                 |
| 250                 | 1 (1.9)           | 4 (8.0)         |
| 500                 | -                 | 2 (4.0)         |
| 750                 | -                 | 1 (2.0)         |
| 1000                | 1 (1.9)           | -               |

ICS = inhaled corticosteroid

\* Fluticasone equivalent ( $\mu\text{g}$ )
